# Supplementary material
Source: Springer Nature journal article supplement (https://www.springermedizin.de/resource/supplementary/12960_2006_61_MOESM3_ESM.pdf/9570328)
Supplement: MOESM3 [file 9570328]

**Table 2 The Guiding Principles for the use of the HRH Framework**

| <b>Principle</b>            | <b>Process Related</b>                                                                                                                                         | <b>Principle</b>         | <b>Content Related</b>                                                                                                    |
|-----------------------------|----------------------------------------------------------------------------------------------------------------------------------------------------------------|--------------------------|---------------------------------------------------------------------------------------------------------------------------|
| <b>Country led</b>          | <i>Initiatives to improve HRH are carried forward by the country rather than external partners.</i>                                                            | <b>Results focused</b>   | <i>HRH strategies and actions are aimed at achieving measurable improvements</i>                                          |
| <b>Government supported</b> | <i>Commitment by the government to support actions which contribute to a sustainable health workforce.</i>                                                     | <b>System linked</b>     | <i>HRH strategies are harmonized with relevant components of the health system (e.g. M&amp;E, supply chain, finance).</i> |
| <b>Multisectoral</b>        | <i>Engagement by all sectors relevant to building the health workforce (e.g. finance, education, public-private providers, etc).</i>                           | <b>Knowledge based</b>   | <i>Decisions are based on best available documented HRH experience.</i>                                                   |
| <b>Multistakeholder</b>     | <i>Inclusion of interest groups relevant to particular actions (e.g. NGO's, patient groups, professional associations, donor coordinating committees, etc)</i> | <b>Learning oriented</b> | <i>Uses M&amp;E to identify lessons learned and best practices to share in-country and globally.</i>                      |
| <b>Donor alignment</b>      | <i>Donor support coordinated and aligned with country HRH plans</i>                                                                                            | <b>Innovation prone</b>  | <i>Openness to exploring new solutions to overcome chronic HRH issues.</i>                                                |
| <b>Gender sensitive</b>     | <i>Gender differences accounted for in analysis and development of HRH strategies.</i>                                                                         |                          |                                                                                                                           |
